# Supplementary material
Source: publisher figshare collection journal article supplement (https://gsajournals.figshare.com/ndownloader/files/14553875)
Supplement: Supplementary file 1 [file 14553875]

Table S2: HMY7 Segregants and Psh Values,,,,,,,
,Assay1,Assay1,Assay2,Assay2,Assay3,Assay3,
Colony,Plate1,Plate2,Plate1,Plate2,Plate1,Plate2,Pool
A1.A,9,16,35,32,18,,
A2.A,8,7,14,10,10,,
A3.A,7,11,14,17,7,12,
A4.A,7,9,14,12,7,11,
A5.A,,,,,,,
A6.A,16,14,35,28,,14,
A7.A,,24,,,,13,
A8.A,15,19,,44,16,,
A9.A,15,14,,,,,
A10.A,10,14,23,26,10,11,
A11.A,11,19,41,32,,0,
A12.A,7,14,,20,,17,
B1.A,8,12,19,13,10,12,
B2.A,5,7,8,12,7,9,
B3.A,5,8,,15,8,7,
B4.A,6,10,10,9,4,7,
B5.A,6,10,15,17,5,7,
B6.A,5,12,19,16,7,8,
B7.A,5,7,8,13,5,7,low
B8.A,13,11,17,15,6,9,low
B9.A,7,11,15,12,7,6,low
B10.A,8,12,25,25,11,9,low
B11.A,8,14,15,21,11,9,low
B12.A,,,23,34,14,,
C1.A,7,13,12,13,7,9,
C2.A,,,,,,,
C3.A,9,13,15,15,5,5,
C4.A,7,8,10,12,5,6,
C5.A,12,18,27,26,11,14,
C6.A,9,21,,25,12,16,
C7.A,6,11,11,12,5,9,
C8.A,5,21,22,29,6,14,
C9.A,,,,,,,
C10.A,5,11,13,11,11,8,
C11.A,,33,35,38,13,,
C12.A,5,17,19,,27,,
D1.A,9,20,27,26,13,24,
D2.A,16,31,28,33,,19,high
D3.A,7,16,11,11,5,6,
D4.A,10,21,27,27,10,16,
D5.A,1,12,18,17,8,8,
D6.A,7,15,19,17,7,11,
D7.A,11,26,27,25,11,14,
D8.A,10,19,26,21,9,13,
D9.A,8,8,10,10,5,6,
D10.A,8,17,21,21,11,15,
D11.A,10,17,,5,7,8,
D12.A,13,22,26,26,9,14,
E1.A,16,27,19,25,12,22,
E2.A,7,,9,15,5,10,
E3.A,7,11,7,11,4,8,
E4.A,8,16,9,12,5,6,
E5.A,9,17,8,12,5,7,
E6.A,8,22,17,20,5,15,
E7.A,,,,,,,
E8.A,7,,11,10,4,10,
E9.A,9,19,19,21,9,11,
E10.A,10,24,24,,10,11,
E11.A,,,38,37,,24,high
E12.A,10,25,19,,20,12,
F1.A,16,24,14,20,9,14,
F2.A,6,,12,9,4,5,
F3.A,8,,10,12,5,10,
F4.A,10,19,24,22,6,9,
F5.A,10,19,13,16,6,10,
F6.A,8,17,10,10,7,8,low
F7.A,7,,9,9,5,8,low
F8.A,6,12,9,10,4,8,low
F9.A,7,16,10,3,8,,low
F10.A,7,22,22,27,9,21,
F11.A,,,,,,,
F12.A,32,44,26,,23,43,
G1.A,13,11,13,13,6,8,
G2.A,22,29,29,26,14,20,
G3.A,10,19,11,20,7,15,
G4.A,,,,,,,
G5.A,6,,9,11,6,8,
G6.A,15,19,18,22,7,18,
G7.A,12,29,24,28,10,17,
G8.A,8,19,13,19,7,,
G9.A,15,27,23,32,10,23,
G10.A,8,22,15,23,12,12,
G11.A,7,16,17,24,8,8,
G12.A,40,48,36,,14,40,
H1.A,6,,14,,7,6,
H2.A,13,,19,27,8,13,
H3.A,21,,27,36,14,17,high
H4.A,10,11,9,14,6,8,
H5.A,22,24,37,25,13,,high
H6.A,8,11,15,20,6,7,
H7.A,8,10,,29,9,12,
H8.A,8,12,13,,7,13,
H9.A,,27,32,38,,,high
H10.A,12,14,23,27,10,,
H11.A,12,15,26,33,8,,
H12.A,23,20,,,,22,
A1.B,,,23,24,,,
A2.B,21,,19,17,25,15,
A3.B,7,,10,9,3,20,
A4.B,16,,8,11,13,12,
A5.B,,,,,,,
A6.B,13,9,8,1,14,8,
A7.B,,,,20,12,13,
A8.B,,11,8,11,11,15,
A9.B,8,10,13,13,11,12,
A10.B,,,,,14,,
A11.B,14,13,14,,15,,
A12.B,19,,22,19,20,,
B1.B,,,12,23,,17,
B2.B,,,10,5,,13,
B3.B,14,,11,11,,10,
B4.B,9,,11,8,,8,
B5.B,13,,8,6,20,13,
B6.B,11,,12,10,14,16,
B7.B,,21,,25,20,14,
B8.B,12,11,9,6,10,12,
B9.B,,,17,,,,
B10.B,19,24,16,,23,,
B11.B,,27,15,11,19,,
B12.B,9,,25,13,,,
C1.B,,,,26,39,17,
C2.B,,,,,,,
C3.B,12,,8,5,,8,low
C4.B,13,,12,5,15,6,low
C5.B,11,,6,6,13,10,low
C6.B,8,,7,,11,10,low
C7.B,11,,9,7,12,9,
C8.B,16,19,12,12,11,12,
C9.B,,,,,,,
C10.B,12,14,11,8,12,16,
C11.B,23,61,39,30,42,32,high
C12.B,8,21,14,10,,9,
D1.B,26,,12,24,23,,
D2.B,31,,16,11,19,12,
D3.B,26,,12,16,21,12,
D4.B,12,,8,10,5,3,
D5.B,10,,9,10,14,11,
D6.B,13,,12,10,17,12,
D7.B,17,19,13,13,12,12,
D8.B,40,75,42,30,63,49,high
D9.B,11,14,6,6,7,11,
D10.B,,26,15,14,16,12,
D11.B,,20,25,12,8,3,
D12.B,8,24,17,14,27,15,
E1.B,,,17,19,15,14,
E2.B,19,,9,13,11,7,
E3.B,11,,12,16,5,10,
E4.B,11,,7,17,14,7,
E5.B,22,,16,18,12,11,
E6.B,12,,15,10,18,6,
E7.B,,,,,,,
E8.B,5,8,7,7,10,8,
E9.B,10,14,8,10,9,8,
E10.B,11,16,11,9,8,10,
E11.B,7,17,17,24,10,11,
E12.B,23,45,25,33,,24,high
F1.B,,,11,,5,12,
F2.B,13,,8,10,10,5,
F3.B,30,,17,17,20,9,
F4.B,10,,5,6,10,8,
F5.B,17,,9,9,12,9,
F6.B,10,,6,10,7,8,
F7.B,15,18,4,11,18,14,
F8.B,10,9,10,20,9,4,
F9.B,12,12,10,20,10,10,
F10.B,13,14,4,15,10,12,
F11.B,,,,,,,
F12.B,29,45,27,13,29,30,high
G1.B,58,,38,,12,23,high
G2.B,,,4,,4,13,
G3.B,51,,31,,21,,high
G4.B,,,,,,,
G5.B,24,,22,32,14,14,
G6.B,15,,10,14,12,7,
G7.B,8,18,14,14,9,11,
G8.B,12,8,10,7,7,6,
G9.B,19,18,4,12,8,10,
G10.B,18,26,20,17,15,12,
G11.B,21,20,24,20,13,14,
G12.B,,,45,22,22,20,high
H1.B,40,,,9,20,21,
H2.B,15,,12,5,8,10,
H3.B,11,,8,6,7,5,
H4.B,15,,19,,,12,
H5.B,19,,15,32,15,14,
H6.B,,,10,13,8,10,
H7.B,3,,5,12,14,9,
H8.B,19,,12,14,11,12,
H9.B,2,,9,6,9,7,
H10.B,12,12,6,5,10,12,
H11.B,31,23,26,34,24,26,high
H12.B,16,18,20,13,10,,
A1.C,16,15,18,16,,,
A2.C,12,12,30,,,,
A3.C,7,11,17,14,,16,
A4.C,7,6,7,11,,17,
A5.C,,,,,,,
A6.C,6,5,9,8,2,17,
A7.C,6,5,,8,4,,
A8.C,,16,,,,,
A9.C,13,13,,,4,,
A10.C,21,14,,,,,
A11.C,6,18,,11,10,,
A12.C,38,52,,,,20,high
B1.C,22,22,34,20,14,23,
B2.C,4,5,17,11,8,3,
B3.C,11,3,17,14,9,18,
B4.C,5,4,14,12,,,
B5.C,6,6,12,8,7,22,
B6.C,23,20,28,18,,36,high
B7.C,12,11,,14,7,22,
B8.C,,,11,11,,,
B9.C,8,6,,11,9,21,
B10.C,6,7,15,6,4,11,low
B11.C,9,22,18,10,5,,
B12.C,18,,,19,,,
C1.C,8,9,11,8,7,14,
C2.C,,,,,,,
C3.C,6,6,12,9,9,16,
C4.C,,,,,,,
C5.C,10,9,14,12,8,16,
C6.C,7,8,13,10,7,4,
C7.C,5,9,12,14,11,16,
C8.C,5,8,9,5,7,19,
C9.C,,,,,,,
C10.C,8,12,14,13,8,19,
C11.C,10,,16,12,,,
C12.C,,,,9,,,
D1.C,8,6,16,8,9,,
D2.C,9,9,18,11,3,15,
D3.C,14,12,21,13,1,17,
D4.C,6,6,14,9,4,14,
D5.C,5,,16,9,7,13,
D6.C,6,7,11,12,9,17,
D7.C,5,8,,,5,14,
D8.C,15,14,,,11,28,
D9.C,7,14,14,12,9,14,
D10.C,3,7,10,9,6,14,low
D11.C,23,29,22,24,21,18,high
D12.C,8,16,,7,,14,
E1.C,,8,23,13,26,12,
E2.C,,,21,,,27,
E3.C,7,8,5,11,9,13,
E4.C,9,12,21,13,9,17,
E5.C,5,5,12,9,13,19,
E6.C,5,7,7,6,8,13,
E7.C,,,,,,,
E8.C,8,8,9,10,5,12,
E9.C,11,16,16,20,11,23,
E10.C,6,8,8,12,5,,
E11.C,6,10,13,11,15,13,
E12.C,,33,,14,,,high
F1.C,,11,,,12,,
F2.C,,11,,16,7,17,
F3.C,,12,,17,9,,
F4.C,6,8,,,7,17,
F5.C,6,8,11,6,7,18,
F6.C,20,19,24,21,14,22,
F7.C,9,14,17,16,8,17,
F8.C,7,7,16,9,10,13,
F9.C,2,7,15,14,7,15,
F10.C,13,17,19,15,11,29,
F11.C,,,,,,,
F12.C,4,9,,18,,5,
G1.C,3,11,,,4,16,
G2.C,3,8,,16,7,20,
G3.C,3,6,,,4,22,
G4.C,,,,,,,
G5.C,6,7,13,8,4,10,
G6.C,9,7,22,8,9,16,
G7.C,13,4,30,18,2,17,
G8.C,4,2,11,18,6,12,
G9.C,4,6,14,15,11,14,
G10.C,7,7,11,12,4,,low
G11.C,11,11,22,,,,
G12.C,7,22,,,,16,
H1.C,33,27,59,50,,17,high
H2.C,7,2,,,8,,
H3.C,8,3,,13,8,,
H4.C,5,6,,9,5,8,
H5.C,4,6,14,9,8,11,
H6.C,7,6,16,5,7,9,
H7.C,7,7,,,5,14,
H8.C,10,10,29,29,,11,
H9.C,2,12,18,,5,14,
H10.C,9,7,24,,6,9,
H11.C,10,9,21,2,5,11,
H12.C,23,34,,45,23,19,high
A1.D,,,11,9,,8,
A2.D,,,,7,,5,
A3.D,9,0,6,8,,6,
A4.D,4,8,8,6,,6,
A5.D,15,8,8,8,9,6,
A6.D,12,7,,,,7,
A7.D,,8,16,6,,11,
A8.D,8,7,8,10,12,8,
A9.D,16,9,14,14,,7,
A10.D,10,9,8,9,,7,
A11.D,20,14,17,15,,8,
A12.D,,,14,21,14,14,
B1.D,,,10,10,9,7,
B2.D,,,5,6,9,6,
B3.D,27,19,8,9,17,7,
B4.D,15,4,7,7,8,7,
B5.D,24,15,,,,14,
B6.D,20,8,7,7,9,8,
B7.D,19,13,12,13,,10,
B8.D,6,6,9,9,12,7,
B9.D,14,13,11,15,8,9,
B10.D,22,16,14,17,12,11,
B11.D,18,8,11,11,11,5,
B12.D,21,43,35,16,,,high
C1.D,21,20,12,11,5,6,
C2.D,,,,,,,
C3.D,11,6,6,7,6,8,low
C4.D,18,6,7,6,7,7,low
C5.D,15,8,8,8,,7,low
C6.D,15,7,7,5,9,7,low
C7.D,13,6,7,12,8,8,
C8.D,18,11,8,11,9,9,
C9.D,,,,,,,
C10.D,17,9,7,6,6,5,
C11.D,,19,,18,9,14,
C12.D,,,11,,8,8,
D1.D,,,8,2,6,6,
D2.D,19,13,8,7,8,10,
D3.D,23,15,11,11,7,11,
D4.D,14,6,4,6,6,7,
D5.D,18,5,4,7,6,8,
D6.D,16,6,5,8,7,9,
D7.D,10,7,6,7,8,9,
D8.D,11,7,6,7,2,8,
D9.D,16,9,12,13,7,11,
D10.D,,,10,11,8,7,
D11.D,,14,11,13,7,6,
D12.D,,,12,,9,0,
E1.D,,,6,7,1,7,
E2.D,,,7,4,1,8,
E3.D,24,14,10,11,10,13,
E4.D,12,6,4,6,7,9,
E5.D,11,3,3,7,8,6,low
E6.D,,14,14,20,13,19,
E7.D,,,,,,,
E8.D,19,9,8,9,6,9,
E9.D,21,7,5,7,8,7,
E10.D,22,10,3,14,8,7,
E11.D,6,11,25,10,8,7,
E12.D,13,7,10,3,10,3,
F1.D,,,1,11,7,7,
F2.D,17,3,5,8,10,10,
F3.D,16,8,6,5,10,8,
F4.D,,15,9,16,14,14,
F5.D,15,7,4,5,9,11,low
F6.D,12,9,7,10,3,7,
F7.D,14,7,5,6,8,9,
F8.D,19,8,6,6,11,10,
F9.D,10,7,6,7,11,12,
F10.D,,7,8,8,7,9,
F11.D,,,,,,,
F12.D,35,31,32,22,25,22,high
G1.D,16,10,11,14,17,3,
G2.D,,,5,6,6,6,
G3.D,17,12,7,11,18,11,
G4.D,,,,,,,
G5.D,27,15,14,12,17,18,
G6.D,10,6,4,7,12,12,
G7.D,14,8,1,5,10,8,
G8.D,,8,8,8,11,12,
G9.D,23,11,9,10,10,9,
G10.D,20,10,9,11,24,11,
G11.D,30,17,13,,25,16,
G12.D,,,,,,23,
H1.D,,,13,12,21,14,
H2.D,13,,10,9,,11,
H3.D,27,11,7,9,16,13,
H4.D,16,7,8,7,6,5,
H5.D,11,5,1,5,14,7,
H6.D,13,10,5,3,12,16,
H7.D,26,,9,9,13,11,
H8.D,19,9,8,11,12,10,
H9.D,17,5,6,8,14,10,
H10.D,13,13,10,10,18,14,
H11.D,19,9,19,18,25,22,
H12.D,,6,5,3,,14,
